# Supplementary material for: Use of Photo-Identification and Mark-Recapture Methodology to Assess Basking Shark (Cetorhinus maximus) Populations
Source: PubMed Central journal article supplement (PMC4773138; doi:10.1371/journal.pone.0150160), 2016-03-01
Supplement: pone.0150160.s001.pdf [file pone.0150160.s001.pdf]

| <u>Database Field</u>                 | <u>Definitions and /or Options</u>                                                                                                                                                                                                                                              |
|---------------------------------------|---------------------------------------------------------------------------------------------------------------------------------------------------------------------------------------------------------------------------------------------------------------------------------|
| <b>Photographer</b>                   | Name of researcher taking photograph & holding original images                                                                                                                                                                                                                  |
| <b>File Reference Name &amp; No.</b>  | Name of original computer, drive & folder where images held                                                                                                                                                                                                                     |
| <b>Shark Catalogue Accession No.</b>  | Unique record identifier within database                                                                                                                                                                                                                                        |
| <b>Matched Reference / ID No.</b>     | Identifiers of other entries to which individual matched                                                                                                                                                                                                                        |
| <b>Region</b>                         | Study area where recorded e.g. Inner Hebrides : Firth of Clyde                                                                                                                                                                                                                  |
| <b>Date</b>                           | Day, month & year                                                                                                                                                                                                                                                               |
| <b>Time</b>                           | Hour & minute                                                                                                                                                                                                                                                                   |
| <b>Location</b>                       | Decimal latitude & longitude                                                                                                                                                                                                                                                    |
| <b>Size</b>                           | Total length in meters, to the nearest half meter                                                                                                                                                                                                                               |
| <b>Quality of Photographic Images</b> | Graded 1 – 3; 1 = high resolution, well lit, many details visible                                                                                                                                                                                                               |
| <b>Grade of fin</b>                   | Distinctiveness of fins - A1 major marks or injuries, usually visible from a distance: A2 conspicuous marks or injuries : B1 – clear marks or injuries visible on close inspection: B2 - visible marks or injuries visible on detailed study : C - no evident marks or injuries |
| <b>Best Show</b>                      | Proportion of fin seen above water on best images: 30% : 60% : 90%                                                                                                                                                                                                              |
| <b>Fin Shape</b>                      | General shape of fin profile – Standard (as in guide book):<br>Pyramidal: Right Angled: Lobed: Conical: Tulip (broadening slightly above the base as in a tulip bud)                                                                                                            |
| <b>Fin Apex</b>                       | Shape of apex of fin - Rounded: Pointed: Missing:: Flat : Other<br>(other feature present at tip)                                                                                                                                                                               |
| <b>Surface Right side</b>             | Indicating any features on right flank of fin - Mark: Scar: Injury:<br>Other Feature: No Feature: Unseen                                                                                                                                                                        |
| <b>Surface Left side</b>              | As for Right side                                                                                                                                                                                                                                                               |
| <b>Leading Edge Shape</b>             | Shape of profile – Straight : Curved : Roman (as in roman-nosed)                                                                                                                                                                                                                |

|                                      |                                                                                                                                                                                      |
|--------------------------------------|--------------------------------------------------------------------------------------------------------------------------------------------------------------------------------------|
| <b>Leading Edge Feature</b>          | Indicating any features on edge - Mark: Scar: Injury: Other Feature:<br>No Feature, Unseen (also for scars & injuries - healing or fresh/raw)                                        |
| <b>Trailing Edge Nature</b>          | Whether trailing edge of fin - Smooth: Frayed: Crenulated                                                                                                                            |
| <b>Top -third Trailing Feature</b>   | Features in top third of trailing edge - Nick: Notch: Large Notch (>10cm): Scrape: Cut: Rope burn: No Feature: Unseen: Other                                                         |
| <b>Mid-third Trailing Feature</b>    | As for Top-third Trailing Feature                                                                                                                                                    |
| <b>Bottom-third Trailing Feature</b> | As for Top-third Trailing Feature                                                                                                                                                    |
| <b>Top Right Surface Feature</b>     | Features on upper right flank of fin - Lamprey: Copepods: Welts:<br>Roughness : Rope burn: Tyre marks: Scrapes: Dark speckles: Dark blotches: Dark patterning : No dark pigmentation |
| <b>Mid Right Surface Feature</b>     | As for Top Right Surface                                                                                                                                                             |
| <b>Bottom Right Surface Feature</b>  | As for Top Right Surface                                                                                                                                                             |
| <b>Top Left Surface Feature</b>      | As for Top Right Surface                                                                                                                                                             |
| <b>Mid Left Surface Feature</b>      | As for Top Right Surface                                                                                                                                                             |
| <b>Bottom Left Surface Feature</b>   | As for Top Right Surface                                                                                                                                                             |
| <b>Placeholder Image Right</b>       | Reference number of best image of right side                                                                                                                                         |
| <b>Placeholder Image Left</b>        | Reference number of best image of left side                                                                                                                                          |
| <b>Good Images</b>                   | Reference numbers of other selected good images                                                                                                                                      |
| <b>No. of Images</b>                 | Number of images retained in the database                                                                                                                                            |
| <b>Comments</b>                      | Comments e.g. on distinctive features of caudal fin or body                                                                                                                          |
